# Supplementary material
Source: publisher figshare collection journal article supplement (https://acs.figshare.com/ndownloader/files/4620004)
Supplement: Supplementary file 1 [file 4620004]

Archive with 5 entries (5 files):
- Read me.txt
- jdosswntfilm0.m
- Hipco_n_m_.txt
- n and k of ITO.jpg
- Supplementary Methods.pdf
