# Supplementary material
Source: publisher figshare collection journal article supplement (https://acs.figshare.com/ndownloader/files/4620004)
Supplement: Supplementary file 1 [file 4620004 › Hipco_n_m_.txt]

6 4
6 5
7 5
7 6
8 3
8 4
8 6
8 7
9 1
9 2
9 4
9 5
9 7
10 0
10 2
10 3
10 5
10 6
11 1
11 3
11 4
11 7
12 1
12 2
12 5
13 3
14 1
15 2
7 7
8 5
8 8
9 3
9 6
9 9
10 4
10 7
11 2
11 5
11 8
12 0
12 3
12 6
13 1
13 4
14 2
15 0

% (n, m) nanotubes present in an HiPCO
% batch as for Fantini et al PRL 93 (2004) 147406
