# Supplementary material
Source: publisher figshare collection journal article supplement (https://acs.figshare.com/ndownloader/files/4620004)
Supplement: Supplementary file 1 [file 4620004 › jdosswntfilm0.m]

function jdos = jdosswntfilm0(ensemble, DE, G, gamma, dCC);

plotflag = -1; % -1 -- plots the band structure during calculations
               %  0 -- does not plot the band structure
               
% dos  1- Photon energies
%      2- In-tube processes (N, k) -> (N, k) for light along tube axis
%      3- In-tube processes (N, k) -> (N-1, k-ko) for light across tube axis
%      4- In-tube processes (N, k) -> (N+1, k+ko) for light across tube axis
%      5- Inter-tube processes (N, k) -> (any N, any K)

% Ensemble = file reporting the ensemble of SWNTS used and related
% probability (e.g. 'Hipco.txt' Please first move to the directory where such file
% is stored)
%


% Optional input arguments:

if nargin < 5
    dCC = 1.41; % A --- carbon carbon bond length
    if nargin < 4
        gamma = 2.87; % eV --- resonace integral for sp2 carbon
        if nargin < 3
            G = 5 * DE;
        end    
    end    
end
L = 3/2*dCC;
tol = 0.75*gamma;

eval(['load ' ensemble ';']);
np = findstr(ensemble, '.') - 1;
ensfilename = ensemble(1:np);
eval(['ens = ' ensfilename ';']);

% In the absence of a column reporting the probability of each (n, m) tube
% in the file ensemble.txt, all tubes reported therein are considered to be
% equally probable

nt = size(ens,1); % no. of SWNTs in the ensemble


if size(ens,2) == 2
    p = ones(nt,1) / nt;
    a = ens(:,1);
    % b = ens(:,2); % Dresselhaus notation (b = n, 0 <= n <= m)
    b = - ens(:,2) - ens(:,1); % (a, b) indices using the notation of Ando-Yamabe-Kataura
                               % see e.g. Synth Met 70 (1995) 1511 and Phys Rev B57 (1998) 9301 
elseif size(ens,2) == 3
    p = ens(:,3);
    a = ens(:,1);
    % b = ens(:,2); % Dresselhaus notation (b = n , 0 <= n <= m)
    b = - ens(:,2) - ens(:,1); % (a, b) indices using the notation of Ando-Yamabe-Kataura
                               % see e.g. Synth Met 70 (1995) 1511 and Phys Rev B57 (1998) 9301 
else
    'ERROR!!! File Ensemble.txt would have 2 or 3 columns'
end    

% Determination of the number of used k-points 

amax = max(a);     % the chiral index n (or a) also represents the number of non-degenerate
                   % pi and pi* bands for the (n, m) or (a, b) nanotube. Thus
                   % amax allocates the number of columns necessary to store
                   % the calculated bands, N = 0, ..., maximum of a - 1.
                 
nkpoints = 361 * ceil(0.1 / DE); 
k = linspace(-pi, pi, nkpoints)' / L * ones(1, amax);
dk = k(2, 1, 1) - k(1, 1, 1);
ko = -(a + 2*b)./(a.^2 + a.*b + b.^2)/L;


% Determination of the band structure

Evh1 = [];
Epi1 = [];
Epk1 = [];

close all
for jt = 1:nt % jt index runs along the set of nanotubes (1...nt) in the ensemble
              % each line in the Ensemble.txt file is a (n, m) nanotube,
              % optionally a (n, m, p) nanotube with its probability p     
              % 0 < p < 1
     
    N(:,:,jt) = ones(nkpoints,1) * [1:a(jt) (a(jt)+1:amax)*NaN];
    
    % Band structure in Dresselhaus notation:
    % Ek(:,:,jt) = gamma * (ones(nkpoints,amax) + 4*cos(pi*N(:,:,jt)/a(jt) - b(jt)/a(jt)*k*L/2) .* cos(k*L/2) + 4 * (cos(k*L/2)).^2).^0.5;
    
    % Band structure in Ando-Yamabe-Kataura notation:

    Ek(:,:,jt) = gamma * (ones(nkpoints,amax) + 4*cos(2*pi*N(:,:,jt)/a(jt) - (a(jt)+2*b(jt))/a(jt)*k*L/2) .* cos(k*L/2) + 4 * (cos(k*L/2)).^2).^0.5;
    dEkdk(:,:,jt) = (Ek(2:nkpoints,:,jt) - Ek(1:nkpoints-1,:,jt)) / dk;
    


    % Row / K-points - k = 0, ..., pi/L (there are nkpoints k-points)
    % Column / Band-number - N = 0, ..., a-1 (there are a non-degenerate bands)
    % Floor / Nanotube - jt = 1, ..., nt (there are nt nanotubes)
    
    if plotflag
        figure(jt)
        hold on
        title(['(' int2str(a(jt)), ', ' int2str(-a(jt)-b(jt)) ')']);
    end
    
    for ja = 1:a(jt)
        
        % [ja jt]
        if plotflag
            plot(k(:, ja), Ek(:, ja, jt))
        end    
        % Conditions for Van Hove singularity:
        % Cond1) Change in sign of dEkdk between k(j) and k(j+1), and
        % Cond2) dEkdk continuous between k(j) and k(j+1) 
        %        [i.e. abs(dEkdk(j) - dEkdk(j+1)) < tol]
        %
        % NOTE: Condition Cond1 is doubled in order to treat the case in which the derivative 
        % dEkdk in one sampled point is exactly zero.   
        
        Cond1 = (dEkdk(:,ja,jt) .* [dEkdk(nkpoints-1,ja,jt); dEkdk(1:nkpoints-2,ja,jt)] < 0) | ...
                (dEkdk(:,ja,jt) == 0);
        
        Cond2 = abs(dEkdk(:,ja,jt) - [dEkdk(nkpoints-1,ja,jt); dEkdk(1:nkpoints-2,ja,jt)]) < tol;
        
        
        jkvh0 = find(Cond1 .* Cond2);
        Evh0 = Ek(jkvh0, ja, jt) ;% *2;
        Kvh0 = k(jkvh0, ja);
        
        
        
        % Determining the change in crystal momenta during diametral
        % transitions (N, k) -> (N+/-1, k+/-ko)
        kkvh0 = jkvh0 + round(ko(jt)/dk);
        % ...Umklapp transitions (folding):
        umkk = find(kkvh0 > nkpoints);
        kkvh0(umkk) = kkvh0(umkk) - nkpoints;
        
        ikvh0 = jkvh0 - round(ko(jt)/dk);
        % ...Umklapp transitions (unfolding):
        umki = find(ikvh0 <= 0);
        ikvh0(umki) = ikvh0(umki) + nkpoints;
        
        if ja == 1
            ia = a(jt);
        else
            ia = ia - 1;
        end  
        Epi0 = Ek(ikvh0, ia, jt);% + Ek(jkvh0, ja, jt);
        Kpi0 = k(ikvh0, ia);

        if ja == a(jt)
            ka = 1;
        else
            ka = ja + 1;
        end    
        Epk0 = Ek(kkvh0, ka, jt);% + Ek(jkvh0, ja, jt);
        Kpk0 = k(kkvh0, ia);
 
       
        if plotflag
             plot(Kpk0, Epk0, 'go')
             plot(Kpi0, Epi0, 'mo')
             plot(Kvh0, Evh0, 'ro')
        end
        
        
        Evh0 = Evh0 + Ek(jkvh0, ja, jt);
        Epi0 = Epi0 + Ek(jkvh0, ja, jt);
        Epk0 = Epk0 + Ek(jkvh0, ja, jt);
        
        Xvh1 = [Kvh0 Evh0 ones(length(Evh0), 1)*[a(jt), -a(jt)-b(jt)]];
        Xpi1 = [Kpi0 Epi0 ones(length(Epi0), 1)*[a(jt), b(jt)]];
        Xpk1 = [Kpk0 Epk0 ones(length(Epk0), 1)*[a(jt), b(jt)]];
        
        Evh1 = [Evh1; Xvh1];
        Epk1 = [Epk1; Xpk1];
        Epi1 = [Epi1; Xpi1];
        
        
    end
    
end    
Eo = (0:DE:3*gamma+DE);
E = (0:DE/10:3*gamma+DE)';

no = length(Eo);
mo = length(E);

E0 = (Eo(1:no-1) + Eo(2:no)) / 2;


for je = 1:no-1
    fo(1,je) = length(find(Evh1(:,2) >= Eo(je) & Evh1(:,2) < Eo(je+1)));
    fo(2,je) = length(find(Epi1(:,2) >= Eo(je) & Epi1(:,2) < Eo(je+1)));
    fo(3,je) = length(find(Epk1(:,2) >= Eo(je) & Epk1(:,2) < Eo(je+1)));
end    

eps1 = sum(1 + (ones(mo,1)*fo(1,:))./((ones(mo,1)*E0).^2-((E*ones(1,no-1))+i*G).^2),2)/nt;
eps2 = sum(1 + (ones(mo,1)*fo(2,:))./((ones(mo,1)*E0).^2-((E*ones(1,no-1))+i*G).^2),2)/nt;
eps3 = sum(1 + (ones(mo,1)*fo(3,:))./((ones(mo,1)*E0).^2-((E*ones(1,no-1))+i*G).^2),2)/nt;

if menu('Close figures','No','Yes') - 1
    close all
    jt = 0;
end

figure(jt+1)
plot(E, real(eps1), 'r', E, real(eps2), 'r--', E, real(eps3), 'r:');
xlabel('Photon energy (eV)')
ylabel('Epsilon1')

figure(jt+2)
plot(E, imag(eps1), 'b', E, imag(eps2), 'b--', E, imag(eps3), 'b:');
xlabel('Photon energy (eV)')
ylabel('Epsilon2')

jdos = [E eps1 eps2 eps3];
