# Supplementary material
Source: publisher figshare collection journal article supplement (https://acs.figshare.com/ndownloader/files/4620004)
Supplement: Supplementary file 1 [file 4620004 › Read me.txt]

SUPPLEMENTARY MATERIAL - Files content

Supplementary Methods.pdf --- Description of the ellipsometry model used in the paper

n_and_k_of_ITO.jpg --- Optical constants of ITO as determined by our 'isotropic' method (eq. 3b)

jdosswntfilm0.m --- Matlab routine used to determine the optical properties of SWNT thin films. Runs under Matlab 6.5 Release 13 and more recent versions.

Hipco_n_m_.txt --- List of the (n, m) indices for Hipco SWNTs as used in our theoretical determination of the optical properties of SWNT thin films
