# Supplementary material
Source: publisher figshare collection journal article supplement (https://acs.figshare.com/ndownloader/files/4620004)

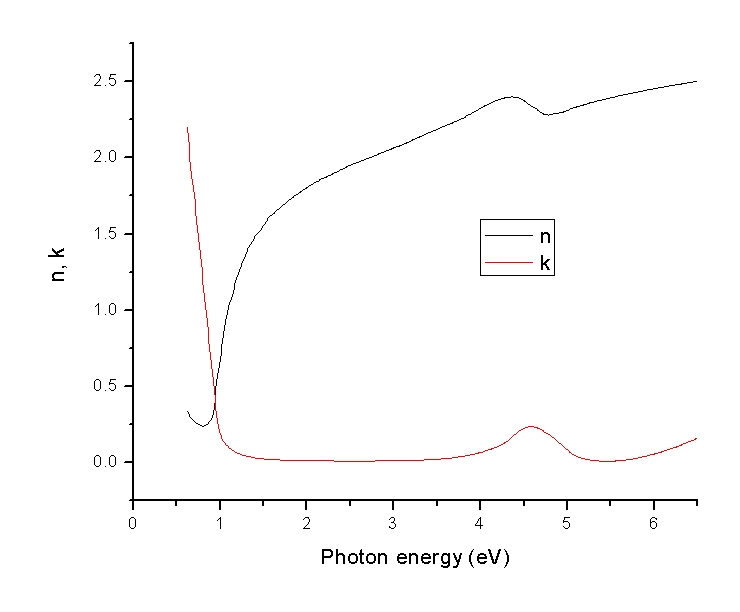

Supplement: Supplementary file 1 [file 4620004 › n and k of ITO.jpg]
